# Supplementary material
Source: publisher figshare collection journal article supplement (https://asha.figshare.com/articles/dataset/_/17155961)
Supplement: Supplementary file 1 [file 1]

**Supplemental Material S2.** Power for given effect sizes, number of participants, and number of surveys per individual for a paired groups comparison.

| Raw Effect Size<br>(difference between<br>groups) | Standardized<br>Effect Size | Participants<br>with Repeated<br>Measures | Number of<br>Surveys Per<br>Participant | Power |
|---------------------------------------------------|-----------------------------|-------------------------------------------|-----------------------------------------|-------|
| 0.524                                             | 0.70                        | 45                                        | 35                                      | 0.999 |
| 0.524                                             | 0.70                        | 30                                        | 35                                      | 0.995 |
| 0.524                                             | 0.70                        | 15                                        | 35                                      | 0.954 |
| 0.524                                             | 0.70                        | 45                                        | 25                                      | 0.998 |
| 0.524                                             | 0.70                        | 30                                        | 25                                      | 0.995 |
| 0.524                                             | 0.70                        | 15                                        | 25                                      | 0.940 |
| 0.524                                             | 0.70                        | 45                                        | 15                                      | 0.998 |
| 0.524                                             | 0.70                        | 30                                        | 15                                      | 0.986 |
| 0.524                                             | 0.70                        | 15                                        | 15                                      | 0.918 |
| 0.524                                             | 0.70                        | 45                                        | 5                                       | 0.984 |
| 0.524                                             | 0.70                        | 30                                        | 5                                       | 0.944 |
| 0.524                                             | 0.70                        | 15                                        | 5                                       | 0.759 |
| 0.524                                             | 0.70                        | 45                                        | Aggregate                               | 0.996 |
| 0.524                                             | 0.70                        | 30                                        | Aggregate                               | 0.959 |
| 0.524                                             | 0.70                        | 15                                        | Aggregate                               | 0.713 |
| 0.374                                             | 0.50                        | 45                                        | 35                                      | 0.988 |
| 0.374                                             | 0.50                        | 30                                        | 35                                      | 0.953 |
| 0.374                                             | 0.50                        | 15                                        | 35                                      | 0.862 |
| 0.374                                             | 0.50                        | 45                                        | 25                                      | 0.978 |
| 0.374                                             | 0.50                        | 30                                        | 25                                      | 0.939 |
| 0.374                                             | 0.50                        | 15                                        | 25                                      | 0.843 |
| 0.374                                             | 0.50                        | 45                                        | 15                                      | 0.979 |
| 0.374                                             | 0.50                        | 30                                        | 15                                      | 0.916 |
| 0.374                                             | 0.50                        | 15                                        | 15                                      | 0.791 |
| 0.374                                             | 0.50                        | 45                                        | 5                                       | 0.886 |
| 0.374                                             | 0.50                        | 30                                        | 5                                       | 0.770 |
| 0.374                                             | 0.50                        | 15                                        | 5                                       | 0.578 |
| 0.374                                             | 0.50                        | 45                                        | Aggregate                               | 0.907 |
| 0.374                                             | 0.50                        | 30                                        | Aggregate                               | 0.754 |
| 0.374                                             | 0.50                        | 15                                        | Aggregate                               | 0.438 |
| 0.224                                             | 0.30                        | 60                                        | 35                                      | 0.928 |
| 0.224                                             | 0.30                        | 45                                        | 35                                      | 0.864 |
| 0.224                                             | 0.30                        | 30                                        | 35                                      | 0.817 |
| 0.224                                             | 0.30                        | 15                                        | 35                                      | 0.764 |
| 0.224                                             | 0.30                        | 60                                        | 25                                      | 0.908 |
| 0.224                                             | 0.30                        | 45                                        | 25                                      | 0.826 |
| 0.224                                             | 0.30                        | 30                                        | 25                                      | 0.789 |
| 0.224                                             | 0.30                        | 15                                        | 25                                      | 0.683 |
| 0.224                                             | 0.30                        | 60                                        | 15                                      | 0.830 |
| 0.224                                             | 0.30                        | 45                                        | 15                                      | 0.783 |
| 0.224                                             | 0.30                        | 30                                        | 15                                      | 0.706 |
| 0.224                                             | 0.30                        | 15                                        | 15                                      | 0.610 |
| 0.224                                             | 0.30                        | 60                                        | 5                                       | 0.705 |

|       |      |    |           |       |
|-------|------|----|-----------|-------|
| 0.224 | 0.30 | 45 | 5         | 0.614 |
| 0.224 | 0.30 | 30 | 5         | 0.509 |
| 0.224 | 0.30 | 15 | 5         | 0.375 |
| 0.224 | 0.30 | 60 | Aggregate | 0.628 |
| 0.224 | 0.30 | 45 | Aggregate | 0.503 |
| 0.224 | 0.30 | 30 | Aggregate | 0.355 |
| 0.224 | 0.30 | 15 | Aggregate | 0.190 |
