# Supplementary material
Source: publisher figshare collection journal article supplement (https://asha.figshare.com/articles/dataset/_/17155961)
Supplement: Supplementary file 2 [file 1]

**Supplemental Material S1.** Power for given effect sizes, number of participants, and number of surveys per individual for a two independent groups comparison.

| Raw Effect Size<br>(difference<br>between groups) | Standardized<br>Effect Size | Participants<br>Per Group | Number of<br>Surveys Per<br>Participant | Power |
|---------------------------------------------------|-----------------------------|---------------------------|-----------------------------------------|-------|
| 0.55                                              | 0.70                        | 45                        | 35                                      | 0.963 |
| 0.55                                              | 0.70                        | 30                        | 35                                      | 0.877 |
| 0.55                                              | 0.70                        | 15                        | 35                                      | 0.568 |
| 0.55                                              | 0.70                        | 45                        | 25                                      | 0.966 |
| 0.55                                              | 0.70                        | 30                        | 25                                      | 0.877 |
| 0.55                                              | 0.70                        | 15                        | 25                                      | 0.570 |
| 0.55                                              | 0.70                        | 45                        | 15                                      | 0.957 |
| 0.55                                              | 0.70                        | 30                        | 15                                      | 0.843 |
| 0.55                                              | 0.70                        | 15                        | 15                                      | 0.563 |
| 0.55                                              | 0.70                        | 45                        | 5                                       | 0.915 |
| 0.55                                              | 0.70                        | 30                        | 5                                       | 0.782 |
| 0.55                                              | 0.70                        | 15                        | 5                                       | 0.473 |
| 0.55                                              | 0.70                        | 45                        | Aggregate                               | 0.907 |
| 0.55                                              | 0.70                        | 30                        | Aggregate                               | 0.760 |
| 0.55                                              | 0.70                        | 15                        | Aggregate                               | 0.457 |
| 0.39                                              | 0.50                        | 60                        | 35                                      | 0.881 |
| 0.39                                              | 0.50                        | 45                        | 35                                      | 0.774 |
| 0.39                                              | 0.50                        | 30                        | 35                                      | 0.603 |
| 0.39                                              | 0.50                        | 15                        | 35                                      | 0.349 |
| 0.39                                              | 0.50                        | 60                        | 25                                      | 0.843 |
| 0.39                                              | 0.50                        | 45                        | 25                                      | 0.775 |
| 0.39                                              | 0.50                        | 30                        | 25                                      | 0.573 |
| 0.39                                              | 0.50                        | 15                        | 25                                      | 0.338 |
| 0.39                                              | 0.50                        | 60                        | 15                                      | 0.845 |
| 0.39                                              | 0.50                        | 45                        | 15                                      | 0.721 |
| 0.39                                              | 0.50                        | 30                        | 15                                      | 0.547 |
| 0.39                                              | 0.50                        | 15                        | 15                                      | 0.342 |
| 0.39                                              | 0.50                        | 60                        | 5                                       | 0.794 |
| 0.39                                              | 0.50                        | 45                        | 5                                       | 0.672 |
| 0.39                                              | 0.50                        | 30                        | 5                                       | 0.498 |
| 0.39                                              | 0.50                        | 15                        | 5                                       | 0.277 |
| 0.39                                              | 0.50                        | 60                        | Aggregate                               | 0.775 |
| 0.39                                              | 0.50                        | 45                        | Aggregate                               | 0.650 |
| 0.39                                              | 0.50                        | 30                        | Aggregate                               | 0.478 |
| 0.39                                              | 0.50                        | 15                        | Aggregate                               | 0.262 |
| 0.23                                              | 0.30                        | 175                       | 35                                      | 0.848 |
| 0.23                                              | 0.30                        | 150                       | 35                                      | 0.821 |
| 0.23                                              | 0.30                        | 125                       | 35                                      | 0.749 |
| 0.23                                              | 0.30                        | 100                       | 35                                      | 0.634 |
| 0.23                                              | 0.30                        | 45                        | 35                                      | 0.340 |
| 0.23                                              | 0.30                        | 30                        | 35                                      | 0.241 |
| 0.23                                              | 0.30                        | 15                        | 35                                      | 0.160 |
| 0.23                                              | 0.30                        | 175                       | 25                                      | 0.871 |

|      |      |     |           |       |
|------|------|-----|-----------|-------|
| 0.23 | 0.30 | 150 | 25        | 0.821 |
| 0.23 | 0.30 | 125 | 25        | 0.730 |
| 0.23 | 0.30 | 100 | 25        | 0.624 |
| 0.23 | 0.30 | 45  | 25        | 0.331 |
| 0.23 | 0.30 | 30  | 25        | 0.241 |
| 0.23 | 0.30 | 15  | 25        | 0.156 |
| 0.23 | 0.30 | 175 | 15        | 0.836 |
| 0.23 | 0.30 | 150 | 15        | 0.774 |
| 0.23 | 0.30 | 125 | 15        | 0.702 |
| 0.23 | 0.30 | 100 | 15        | 0.598 |
| 0.23 | 0.30 | 45  | 15        | 0.331 |
| 0.23 | 0.30 | 30  | 15        | 0.227 |
| 0.23 | 0.30 | 15  | 15        | 0.138 |
| 0.23 | 0.30 | 175 | 5         | 0.793 |
| 0.23 | 0.30 | 150 | 5         | 0.713 |
| 0.23 | 0.30 | 125 | 5         | 0.632 |
| 0.23 | 0.30 | 100 | 5         | 0.562 |
| 0.23 | 0.30 | 45  | 5         | 0.292 |
| 0.23 | 0.30 | 30  | 5         | 0.207 |
| 0.23 | 0.30 | 15  | 5         | 0.139 |
| 0.23 | 0.30 | 175 | Aggregate | 0.799 |
| 0.23 | 0.30 | 150 | Aggregate | 0.736 |
| 0.23 | 0.30 | 125 | Aggregate | 0.656 |
| 0.23 | 0.30 | 100 | Aggregate | 0.560 |
| 0.23 | 0.30 | 45  | Aggregate | 0.290 |
| 0.23 | 0.30 | 30  | Aggregate | 0.206 |
| 0.23 | 0.30 | 15  | Aggregate | 0.122 |
